# Supplementary material
Source: PubMed Central journal article supplement (PMC6336813)
Supplement: 41431_2018_271_MOESM8_ESM.pdf [file 41431_2018_271_MOESM8_ESM.pdf]

**Supplemental Figure 1:** Distribution of the number of non-duplicate aligned reads per sample.

**Supplemental Figure 2:** FF distributions for each bioinformatics tool, separated for male (blue) and female (salmon) fetuses. DEFrag is based on Y chromosome analysis and therefore does not include FF for female fetuses.

**Supplemental Figure 3:** FF as a function of blood shipping time (A-male fetuses with DEFrag\_W, B-female fetuses with SeqFF).

**Supplemental Figure 4:** Distribution of gestational age in this cohort.

**Supplemental Figure 5:** Female fetuses FF as determined by SeqFF as a function of gestational time (A), maternal age (B), weight (C), and trisomies (D).

**Supplemental Figure 6:** FF as a function of BMI (A-male fetuses with DEFrag\_W, B-female fetuses with SeqFF).
